# Supplementary material
Source: PubMed Central journal article supplement (PMC6195846)
Supplement: NIHMS984853-supplement-Supp_info.pdf [file NIHMS984853-supplement-Supp_info.pdf]

## SUPPLEMENTAL INFORMATION

### ***Rhodobacterales* use a unique L-threonine kinase for the assembly of the nucleotide loop of coenzyme B<sub>12</sub>**

Norbert K. Tavares, Chelsey M. VanDrisse, and Jorge C. Escalante-Semerena\*  
Department of Microbiology, University of Georgia

\*Corresponding author: Department of Microbiology, University of Georgia, 212C Biological Sciences Building, 120 Cedar Street, Athens, GA 30602. Phone: +1 (706) 542-2651, Fax: +1 (706) 542-2815 email: [jcescala@uga.edu](mailto:jcescala@uga.edu)

Running title: BluE, a unique L-Thr kinase found in *Rhodobacterales*

## SUPPLEMENTAL TABLES

**Table S1. Locus tag list.** List of BluE and PduX homologues and their corresponding locus tags, phylum Class, order, genera, species and strain names used in the phylogenetic analysis.

| <b>BluE homologues</b> |                                                 |                |                     |                   |
|------------------------|-------------------------------------------------|----------------|---------------------|-------------------|
| <b>Locus Tag</b>       | <b>Organism</b>                                 | <b>Phylum</b>  | <b>Class</b>        | <b>Order</b>      |
| ACMU_15650             | <i>Actibacterium mucosum</i><br>KCTC 23349      | Proteobacteria | Alphaproteobacteria | Rhodobacterales   |
| U879_17450             | <i>Defluviimonas</i> sp. 20V17                  | Proteobacteria | Alphaproteobacteria | Rhodobacterales   |
| IQ03DRAFT_04856        | <i>Gemmobacter caeni</i><br>CGMCC 1.7745        | Proteobacteria | Alphaproteobacteria | Rhodobacterales   |
| Ga0057541_01298        | <i>Maribius</i> sp. MOLA 401                    | Proteobacteria | Alphaproteobacteria | Rhodobacterales   |
| B161DRAFT_02277        | <i>Meganema perideroedes</i><br>DSM 15528       | Proteobacteria | Alphaproteobacteria | Rhizobiales       |
| U745DRAFT_3163         | <i>Oceanicola</i> sp.<br>MCTG156(1a)            | Proteobacteria | Alphaproteobacteria | Rhodobacterales   |
| RCAP_rcc02055          | <i>Rhodobacter capsulatus</i><br>SB1003         | Proteobacteria | Alphaproteobacteria | Rhodobacterales   |
| RSP_0788               | <i>Rhodobacter sphaeroides</i><br>2.4.1         | Proteobacteria | Alphaproteobacteria | Rhodobacterales   |
| OCH239_08945           | <i>Roseivivax halodurans</i><br>JCM 10272       | Proteobacteria | Alphaproteobacteria | Rhodobacterales   |
| RGAI101_1337           | <i>Roseobacter</i> sp. GAI101                   | Proteobacteria | Alphaproteobacteria | Rhodobacterales   |
| SSE37_12289            | <i>Sagittula stellata</i> E-37                  | Proteobacteria | Alphaproteobacteria | Rhodobacterales   |
| ATO10_12729            | <i>Shimia</i> sp. 22II-S11-Z10                  | Proteobacteria | Alphaproteobacteria | Rhodobacterales   |
| PM01_02495             | <i>Sulfitobacter pontiacus</i><br>3SOLIMAR09    | Proteobacteria | Alphaproteobacteria | Rhodobacterales   |
| TP2_17155              | <i>Thioclava pacifica</i> DSM<br>10166          | Proteobacteria | Alphaproteobacteria | Rhodobacterales   |
| <b>PduX homologues</b> |                                                 |                |                     |                   |
| <b>Locus Tag</b>       | <b>Organism</b>                                 | <b>Phylum</b>  | <b>Class</b>        | <b>Order</b>      |
| Acear_0846             | <i>Acetohalobium arabaticum</i><br>Z-7288       | Firmicutes     | Clostridia          | Halanaerobiales   |
| Bresa_02388            | <i>Brenneria salicis</i> Dye<br>EX2, ATCC 15712 | Proteobacteria | Gammaproteobacteria | Enterobacteriales |
| CFNIH1_21285           | <i>Citrobacter freundii</i><br>CFNIH1           | Proteobacteria | Gammaproteobacteria | Enterobacteriales |
| CDM120_03509           | <i>Clostridium difficile</i> M120               | Firmicutes     | Clostridia          | Clostridiales     |
| DSY4058                | <i>Desulfitobacterium hafniense</i> Y51         | Firmicutes     | Clostridia          | Clostridiales     |
| Desca_0591             | <i>Desulfotomaculum carboxydivorans</i>         | Firmicutes     | Clostridia          | Clostridiales     |
| ETAF_1814              | <i>Edwardsiella tarda</i> FL6-60                | Proteobacteria | Gammaproteobacteria | Enterobacteriales |
| Entcl_1739             | <i>Enterobacter cloacae</i><br>SCF1             | Proteobacteria | Gammaproteobacteria | Enterobacteriales |
| CrFGI571_1619          | <i>Enterobacteriaceae bacterium</i> FGI 57      | Proteobacteria | Gammaproteobacteria | Enterobacteriales |
| ELI_0756               | <i>Eubacterium limosum</i><br>KIST612           | Firmicutes     | Clostridia          | Clostridiales     |
| Halha_1700             | <i>Halobacteroides halobius</i><br>MD-1         | Firmicutes     | Clostridia          | Halanaerobiales   |
| HR38_27680             | <i>Klebsiella oxytoca</i> M1                    | Proteobacteria | Gammaproteobacteria | Enterobacteriales |

|                 |                                                          |                |                     |                        |
|-----------------|----------------------------------------------------------|----------------|---------------------|------------------------|
| Ga0057525_01204 | <i>Listeria monocytogenes</i><br>Lm60                    | Firmicutes     | Bacilli             | Bacillales             |
| Mahau_0759      | <i>Mahella australiensis</i> 50-1<br>BON, DSM 15567      | Firmicutes     | Clostridia          | Thermoanaerobacterales |
| Moth_1103       | <i>Moorella thermoacetica</i><br>ATCC 39073              | Firmicutes     | Clostridia          | Thermoanaerobacterales |
| MU9_1018        | <i>Morganella morganii</i><br>morganii KT                | Proteobacteria | Gammaproteobacteria | Enterobacteriales      |
| plu2966         | <i>Photorhabdus luminescens</i><br><i>laumondii</i> TTO1 | Proteobacteria | Gammaproteobacteria | Enterobacteriales      |
| STM2058         | <i>Salmonella enterica</i> sv.<br>Typhimurium LT2        | Proteobacteria | Gammaproteobacteria | Enterobacteriales      |
| EBL_c14750      | <i>Shimwellia blattae</i> DSM<br>4481                    | Proteobacteria | Gammaproteobacteria | Enterobacteriales      |
| TEPIRE1_11390   | <i>Tepidanaerobacter</i><br><i>acetatoxydans</i> Re1     | Firmicutes     | Clostridia          | Thermoanaerobacterales |
| Tph_c05150      | <i>Thermacetogenium</i><br><i>phaeum</i> PB, DSM 12270   | Firmicutes     | Clostridia          | Thermoanaerobacterales |
| TherJR_1311     | <i>Thermincola potens</i> JR                             | Firmicutes     | Clostridia          | Clostridiales          |
| Tlie_0163       | <i>Thermovirga lienii</i><br>Cas60314, DSM 17291         | Synergistetes  | Synergistia         | Synergistales          |
| Tola_1706       | <i>Tolomonas auensis</i> TA 4,<br>DSM 9187               | Proteobacteria | Gammaproteobacteria | Aeromonadales          |
| Vpar_0909       | <i>Veillonella parvula</i> Te3,<br>DSM 2008              | Firmicutes     | Negativicutes       | Selenomonadales        |
| XNC1_1145       | <i>Xenorhabdus nematophila</i><br>ATCC 19061             | Proteobacteria | Gammaproteobacteria | Enterobacteriales      |
| Ga0058816_01570 | <i>Yersinia kristensenii</i> 33639                       | Proteobacteria | Gammaproteobacteria | Enterobacteriales      |

**Table S2. Strains and plasmids used in this study.** *S. enterica* strains are derivatives of subsp. *enterica* serovar Typhimurium strain LT2. Strains and plasmids were constructed during the course of this work unless stated otherwise.

| Strain/Plasmid                    | Relevant genotype                                   | Reference Source      |
|-----------------------------------|-----------------------------------------------------|-----------------------|
| <b><i>Salmonella enterica</i></b> |                                                     |                       |
| JE7088                            | $\Delta metE2702 ara-9$                             | Laboratory collection |
| <b>Derivatives of JE7088</b>      |                                                     |                       |
| JE11685                           | / pBAD24 <i>bla</i> <sup>+</sup>                    |                       |
| JE11686                           | / pBAD30 <i>bla</i> <sup>+</sup>                    |                       |
| JE12914                           | / pPDU15 <i>bla</i> <sup>+</sup>                    |                       |
| JE12656                           | $\Delta pduX516$                                    |                       |
| JE12686                           | $\Delta pduX516$ / pPDU15 <i>bla</i> <sup>+</sup>   |                       |
| JE13063                           | $\Delta pduX516$ / pBAD30 <i>bla</i> <sup>+</sup>   |                       |
| JE15873                           | $\Delta pduX516$ / pRcBLUE3 <i>bla</i> <sup>+</sup> |                       |
| JE16285                           | $\Delta pduX516$ / pRsBLUE3 <i>bla</i> <sup>+</sup> |                       |
| JE21278                           | $\Delta pduX516$ / pRsBLUE7 <i>bla</i> <sup>+</sup> |                       |
| JE21979                           | $\Delta pduX516$ / pBAD24 <i>bla</i> <sup>+</sup>   |                       |
| JE12941                           | $\Delta cobD1371$                                   |                       |
| JE14935                           | $\Delta cobD1371$ / pBAD24 <i>bla</i> <sup>+</sup>  |                       |

***Escherichia coli***

|                                   |                                                                                                                                                                                                                                                                                                                                                        |                                 |
|-----------------------------------|--------------------------------------------------------------------------------------------------------------------------------------------------------------------------------------------------------------------------------------------------------------------------------------------------------------------------------------------------------|---------------------------------|
| BL21 (λDE3)                       | F <sup>-</sup> / <i>ompT</i> , <i>hsdS<sub>B</sub></i> , ( <i>rB<sup>-</sup></i> , <i>mB<sup>-</sup></i> ), <i>dcm</i> , <i>gal</i> , λ (DE3)                                                                                                                                                                                                          |                                 |
| C41 (λDE3)                        | F <sup>-</sup> / <i>ompT</i> , <i>hsdS<sub>B</sub></i> , ( <i>rB<sup>-</sup></i> <i>mB<sup>-</sup></i> ) <i>dcm</i> , <i>gal</i> λ (DE3); BL21 derivative optimized for protein overexpression, including at least one uncharacterized mutation                                                                                                        | (Miroux & Walker, 1996)         |
| C43 (λDE3)                        | F <sup>-</sup> / <i>ompT gal hsdS<sub>B</sub> (rB<sup>-</sup> mB<sup>-</sup>) [dcm] [lon]</i> C41 derivative, including at least two uncharacterized mutations                                                                                                                                                                                         | (Miroux & Walker, 1996)         |
| BL21 (λDE3) RIL                   | RIL Codon Plus plasmid (RIL) <i>argU</i> , <sup>+</sup> <i>ileY</i> <sup>+</sup> , <i>leuW</i> <sup>+</sup> tRNAs <i>cat</i> <sup>+</sup>                                                                                                                                                                                                              | (Miroux & Walker, 1996)         |
| BL21/pLysSRARE2                   | <i>lysS</i> <sup>+</sup> <i>cat</i> <sup>+</sup> <i>argU</i> <sup>+</sup> , <i>argW</i> <sup>+</sup> , <i>ileX</i> <sup>+</sup> , <i>glyT</i> <sup>+</sup> , <i>leuW</i> <sup>+</sup> , <i>proL</i> <sup>+</sup> , <i>metT</i> <sup>+</sup> , <i>thrT</i> <sup>+</sup> , <i>tyrU</i> <sup>+</sup> , <i>thrU</i> <sup>+</sup> tRNAs                     | Stratagene                      |
| Rosetta2(DE3)/pLysS Lemo21 (λDE3) | F <sup>-</sup> / <i>ompT hsdS8 (rB<sup>-</sup> mB<sup>-</sup>) gal dcm lacY1 / lysS<sup>+</sup> cat<sup>+</sup> fhuA2 [lon] ompT gal</i> λ (DE3) [ <i>dcm</i> ] Δ <i>hsdS</i> Δ <i>lacI</i> :: <i>PlacUV5</i> ::T7 i21 Δ <i>nin5</i> ( <i>cat</i> <sup>+</sup> ) pLemo = pACYC184 plasmid - <i>PrhaBAD-lysY</i> <sup>+</sup> , <i>cat</i> <sup>+</sup> | Novagen<br>NEB                  |
| DH5α                              | F <sup>-</sup> / <i>endA1 hsdR17(rk, mk<sup>+</sup>) glnV44 thi-1 recA1 gyrA96 (Nx<sup>R</sup>) relA1 UI69 deoR</i> (Φ80-dlacZ M15 Δ( <i>lacZYA-argF</i> ) <i>phoAsupE44 relA1</i>                                                                                                                                                                     | (Woodcock <i>et al.</i> , 1989) |

***Rhodobacter sphaeroides* 2.4.1**

|         |                                                                |            |
|---------|----------------------------------------------------------------|------------|
| JE8777  | <i>cobB</i> <sup>+</sup> <i>bluE</i> <sup>+</sup>              | T. Donohue |
| JE24356 | <i>cobB</i> <sup>+</sup> <i>bluE</i> <sup>+</sup> / pBBR1MCS-2 |            |
| JE24357 | Δ <i>cobB</i> / pBBR1MCS-2                                     |            |
| JE24358 | Δ <i>bluE</i> / pBBR1MCS-2                                     |            |
| JE24359 | Δ <i>cobB</i> Δ <i>bluE</i> / pBBR1MCS-2                       |            |
| JE24360 | Δ <i>bluE</i> / pRsBLUE10                                      |            |
| JE24361 | Δ <i>cobB</i> Δ <i>bluE</i> / pRsBLUE10                        |            |

**Plasmids**

|                  |                                                                                                                  |                                         |
|------------------|------------------------------------------------------------------------------------------------------------------|-----------------------------------------|
| pPDU15           | <i>S. enterica pduX</i> <sup>+</sup> in pBAD30 <i>bla</i> <sup>+</sup>                                           |                                         |
| pRcBLUE3         | <i>R. capsulatus bluE</i> <sup>+</sup> in pBAD24 <i>bla</i> <sup>+</sup>                                         |                                         |
| pRsBLUE3         | <i>R. sphaeroides bluE</i> <sup>+</sup> in pBAD24 <i>bla</i> <sup>+</sup>                                        |                                         |
| pPDU23           | <i>S. enterica pduX</i> <sup>+</sup> in pTEV5 <i>bla</i> <sup>+</sup>                                            |                                         |
| pRsBLUE4         | <i>R. sphaeroides bluE</i> <sup>+</sup> in pTEV5 <i>bla</i> <sup>+</sup>                                         |                                         |
| pRsBLUE7         | <i>R. sphaeroides bluE06</i> (encodes <i>RsCobD</i> <sup>G99A</sup> ) in pTEV5 <i>bla</i> <sup>+</sup>           |                                         |
| pRsBLUE9         | <i>bluE</i> deletion plasmid for <i>R. sphaeroides</i>                                                           |                                         |
| pRsBLUE10        | <i>R. sphaeroides bluE</i> in pBBR1MCS-2                                                                         |                                         |
| pTA925-PduX-His6 | <i>S. enterica pduX</i> <sup>+</sup> in pTA925 <i>kan</i> <sup>+</sup>                                           | (Fan & Bobik, 2008),<br>T. Bobik        |
| pTA925-His8-PduX | <i>S. enterica pduX</i> <sup>+</sup> in pTA925 <i>kan</i> <sup>+</sup>                                           | (Fan <i>et al.</i> , 2009), T.<br>Bobik |
| pBAD24           | Cloning / complementation vector <i>bla</i> <sup>+</sup>                                                         | (Guzman <i>et al.</i> , 1995)           |
| pBAD30           | Cloning / complementation vector <i>bla</i> <sup>+</sup>                                                         | (Guzman <i>et al.</i> , 1995)           |
| pTEV5            | Cloning / overexpression vector, N-terminal rTEV protease-cleavable His <sub>6</sub> tag <i>bla</i> <sup>+</sup> | (Rocco <i>et al.</i> , 2008)            |
| pK18mobsacB      | Suicide vector for allelic exchange <i>kan</i> <sup>+</sup> <i>sacB</i> <sup>+</sup>                             | (Schafer <i>et al.</i> , 1994)          |
| pBBR1MCS-2       | Cloning / complementation vector <i>kan</i> <sup>+</sup>                                                         | (Kovach <i>et al.</i> , 1995)           |

pTA925

Cloning / overexpression vector *kan*<sup>+</sup>(Johnson *et al.*,  
2001), T. Bobik**Table S3. Primer list.** List of primers used in this study. Sequences in bold were the restriction enzyme cut site indicated in the primer name.

| Name                             | Sequence                                                    |
|----------------------------------|-------------------------------------------------------------|
| <b>Deletion primers</b>          |                                                             |
| pduX_wan5'_b                     | ATGCGCGCACACTATTCGTACCTGAAAGGTGATAATGTGGTGTAGGCTGGAGCTGCTTC |
| pduX_wan3'_b                     | GCCAGTGACCATCTTGAGTAAATGTTGTTTTGGCCAGTGCATATGAATATCCTCCTTAG |
| RSP0788_delA_EcoRI               | NNNNNN <b>GAATTC</b> TCGAGCTTGCCTCAGG                       |
| RSP0788_delB                     | GCCAAGGCCAGCGCGAGCGGC                                       |
| RSP0788_delC                     | CGCGCTGGCCTTGGCCACGGT                                       |
| RSP0788_delD_SacI                | NNNNNN <b>TCTAGAG</b> CGTGCTCGCCATCGA                       |
| <b>Cloning primers</b>           |                                                             |
| pduX_KpnI5'                      | TAGGGGT <b>ACC</b> ATGCGCGCACACTATTCGTA                     |
| pduX_Hind3'                      | TAGGA <b>AGCTTT</b> CACTGCAGTTTGACCCCG                      |
| Rc_BluE_EcoRI5'                  | AGCT <b>GAATTC</b> TTTGGTTCGATCGCGGGCGTGAA                  |
| Rc_BluE_XbaI3'                   | ATCG <b>TCTAGA</b> ATCGCCACCACCATCATC                       |
| RsBluE_Nhe5'                     | TGAA <b>GCTAG</b> CGGCACTGCAATGACGCTG                       |
| RsBluE_KpnI5'                    | TAGGGT <b>ACC</b> ATGACGCTGGCGGGCCTCA                       |
| RsBluE_HindIII3'                 | TAGA <b>AGCTTT</b> CAGGCTCCGCCGATGCGGAA                     |
| RSP0788_EcoRI5'                  | AGT <b>GAATTC</b> GGCACTGCAATGACGCTG                        |
| RSP0788_XbaI3'                   | ATCT <b>CTAG</b> AGATAGGGCACCCGGTTGAT                       |
| RSP0788_HindIII_5'               | NNNNNN <b>AAGCTT</b> GGCACTGCAATGACGCTG                     |
| RSP0788_EcoRI_3'                 | NNNNNN <b>GAATTC</b> TCTCAGGCTCCGCCGATGC                    |
| <b>Site directed mutagenesis</b> |                                                             |
| RsBluE_G99A                      | GCCGGCGGCGCAGCGGGCGCCTCGA                                   |
| <b>Sequencing primers</b>        |                                                             |
| pduX_flank5'                     | GCGTAATGCGACATTTATCCA                                       |
| pduX_flank3'                     | TGAGGCGATTCAGGGTATCAT                                       |
| cobD_flank5'                     | CGACATTGGCCTCGGTTT                                          |
| cobD_flank3'                     | GAAACGCCCTGGCTTAAT                                          |
| RSP0788_flank 5'                 | GGTCGAGCATCTGGCCAGCT                                        |
| RSP0788_flank 3'                 | GATCCCCGTCGAGAGGTCGA                                        |

## SUPPLEMENTAL FIGURES

**Figure S1. Complementation of *S. enterica pduX* strain.** Representative graphs of growth analyses of *S. enterica* cells grown aerobically at 37°C in NCE minimal medium with A. glycerol (22 mM) and Cby (1 nM) or B. ethanolamine (90 mM), Cby (300 nM), DMB (0.15 mM), and supplemented with arabinose (0.5 mM), ampicillin (0.1 mg mL<sup>-1</sup>), and MgSO<sub>4</sub> (1 mM). Experiments were replicated in three independent experiments, each performed in triplicate. Error bar represent the standard error of the mean. Figure key:  $\Delta pduX/pRsBluE$  ( $\square$ ),  $\Delta pduX/pSePduX$  ( $\blacktriangle$ ),  $\Delta pduX/pRsBluE^{G99A}$  ( $\blacklozenge$ ),  $\Delta pduX/vector$  ( $\circ$ ),  $pduX^+/vector$  ( $\triangle$ ).

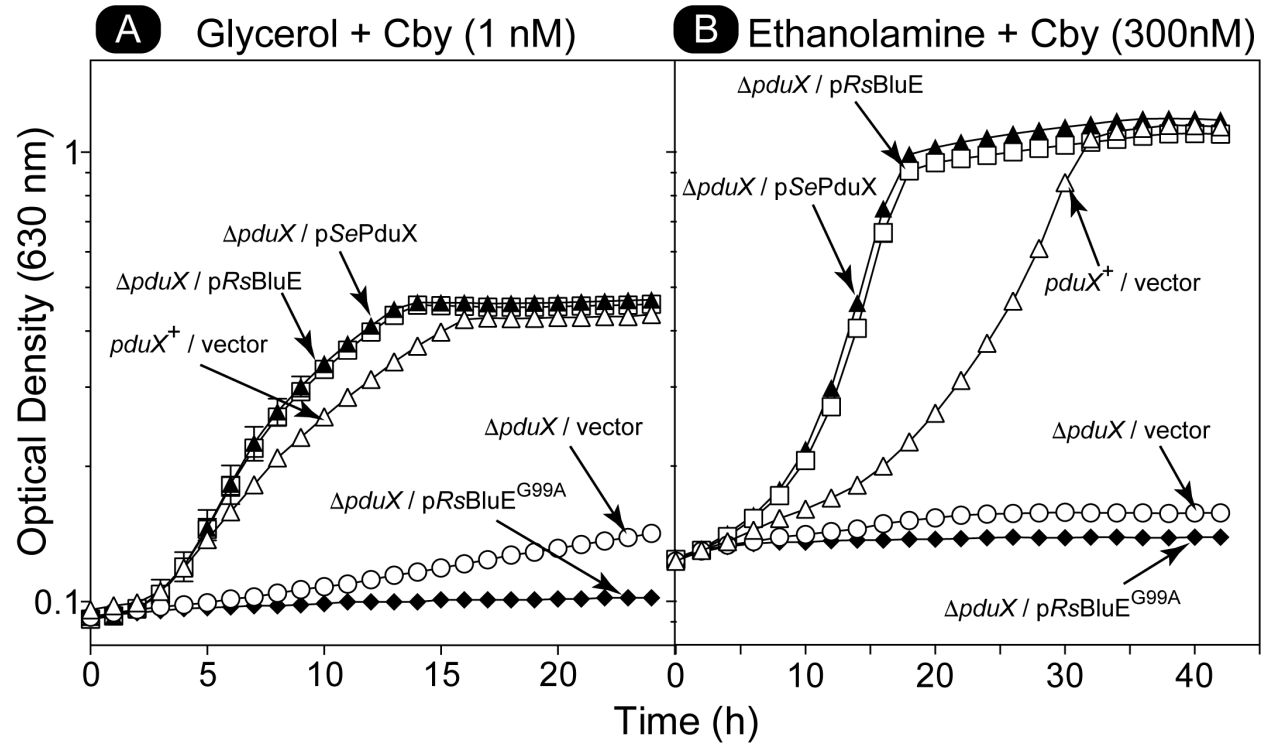

**Figure S2. Pigmentation scan of *R. sphaeroides* *bluE*<sup>+</sup> and  $\Delta$ *bluE* cells supplemented with or without cyanocobalamin (CNCbl).** Cells were grown aerobically in Sistrom's Medium (5 mL) with succinate (10 mM) for 3 days at 30°C without the addition of CNCbl (panel A). The absence of BluE function resulted in a 'blush' phenotype (panel B) that could be complemented by ectopically expressing the *bluE*<sup>+</sup> allele (squares, panel A), or by supplementing the medium with CNCbl (15 nM). Cultures (5 mL) were centrifuged at 6,000 x g for 5 min. Cells were re-suspended in 0.5 mL of Sistrom's medium and absorbance readings were taken at 10 nm increments. Sistrom's medium was used as a blank for absorbance readings. Differences in pigments were noted by observation of readings taken at 800 and 875 nm. Results were obtained in technical triplicate and error bars represent standard error of the mean (SEM). Pellets shown in panels B and C were obtained using a microcentrifuge.

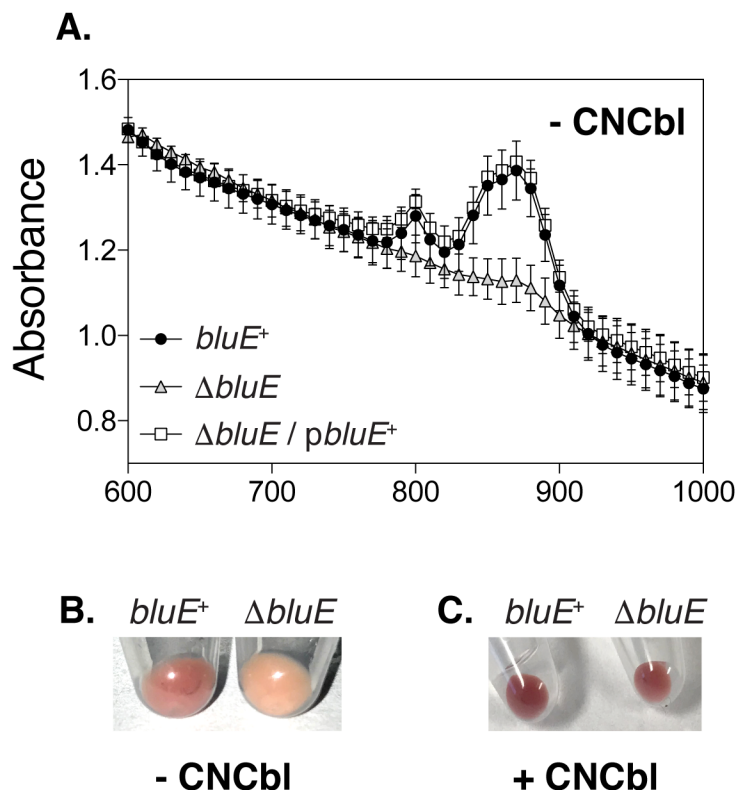

**Figure S3. Standard curve for ATP to ADP conversion.** Standard curve used to calculate the percent conversion of ADP to ATP using the ADP-Glo™ Kinase/ATPase Assay kit (Promega). Luminescence was measured at 560 nm. RLU; relative light units.

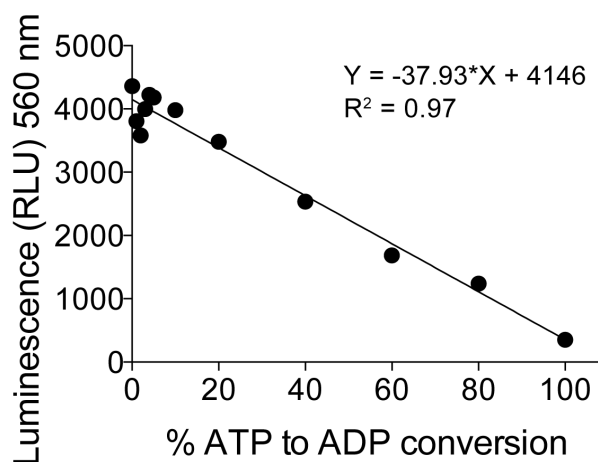

**Figure S4. SDS-PAGE gel of partially purified detergent-free H<sub>6</sub>-tagged proteins.** SDS-PAGE gels showing partially purified proteins. Each gel shows a protein size marker in lane 1, followed by whole cell extracts in lane 2, and in lane 3 enriched fractions of partially purified His<sub>6</sub>-tagged proteins eluted from a Ni-NTA resin with 200 mM imidazole. A. *RsBluE*, B. *SePduX*, and C. extracts from cells expressing the empty overexpression vector pTEV5. Dashed line indicates the location where the gel images were spliced together for simple and clear presentation. For whole cell extracts, protein concentration was calculated using a Bradford Assay and 20 µg of protein was loaded to each lane.

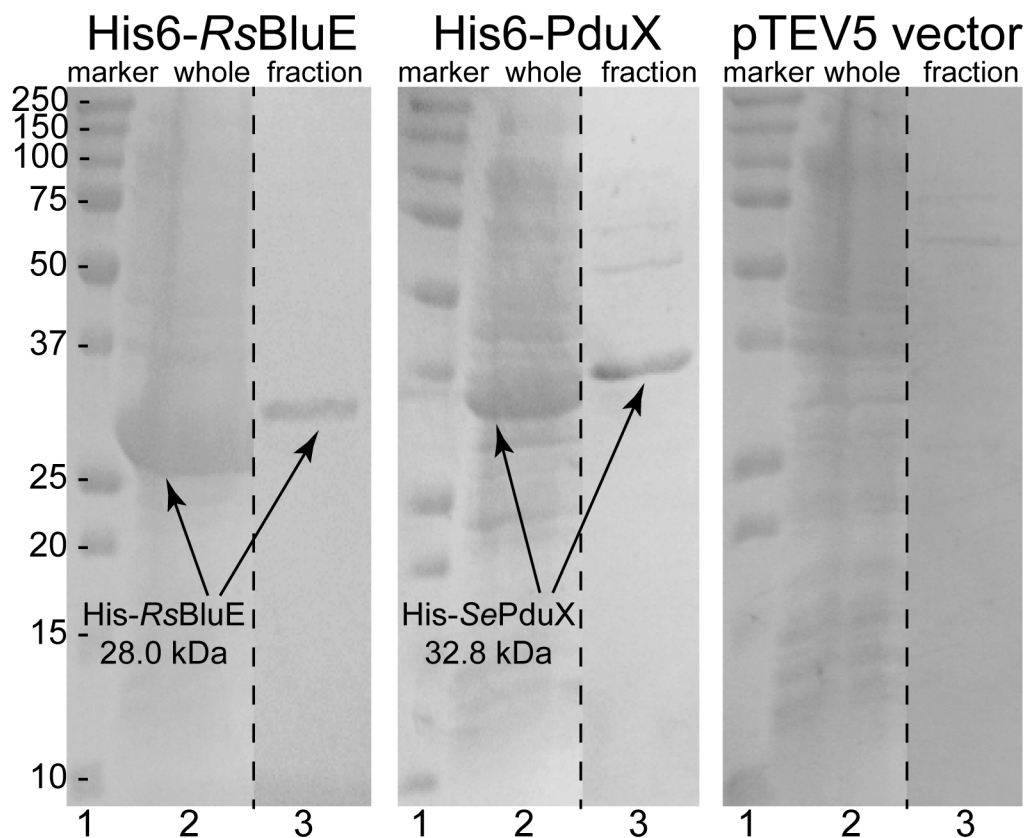



**Figure S5. SDS-PAGE gel comparing overexpression and solubility of detergent free *N*- and *C*-terminal His-tagged *SePduX* and *RsBluE* proteins.** SDS-page gel showing the soluble and insoluble fractions of previously published plasmids (Fan *et al.*, 2009, Fan & Bobik, 2008) encoding *SePduX* with a non-cleavable *C*-terminal His<sub>6</sub>-tag (pTA925-PduX-His6 (Fan & Bobik, 2008), lanes 2, 3) and a non-cleavable *N*-terminal His<sub>8</sub>-tag (pTA925-His8-PduX (Fan *et al.*, 2009), lanes 4, 5), and plasmids generated during the course of this work encoding rTEV protease-cleavable *N*-terminal His<sub>6</sub>-tagged *SePduX* (pPDU23, lane 6, 7), and *RsBluE* (pRsBLUE4, lanes 8, 9), and protein expression levels when these inducible plasmids are not induced with IPTG (lanes 10). Proteins were purified as described in *Materials and Methods*. Lane 1 shows the protein size marker. The theoretical molecular weights for *RsBluE* and *SePduX* without the His-tags or rTEV cleavage sites are shown in Kilodaltons (kDa). Arrows indicate the location of the overexpressed proteins of interest. For whole cell extracts, protein concentration was calculated using a Bradford Assay and 20  $\mu$ g of protein was loaded to each lane.

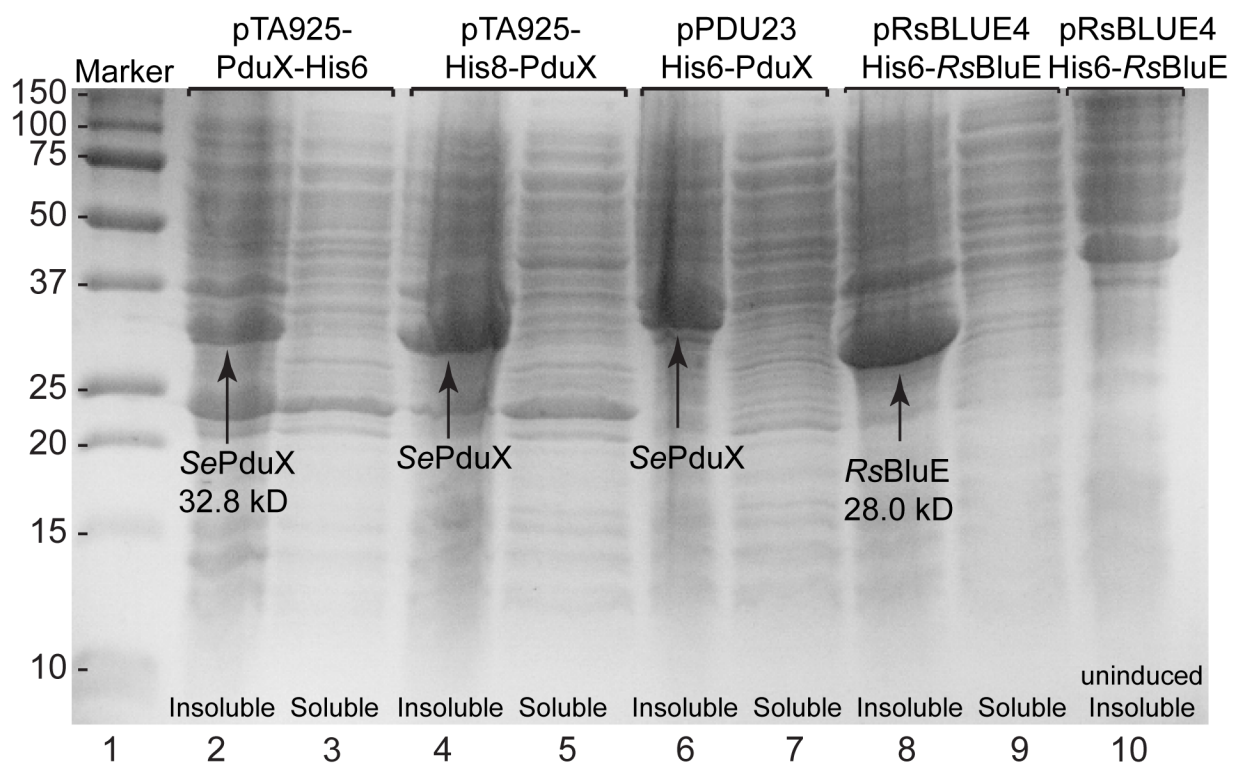

**Figure S6.**  $^{31}\text{P}$ -NMR spectra of *RsBluE* reaction containing L-Ser and or ATP. Representative  $^{31}\text{P}$ -NMR spectra of duplicate experiments used to detect the  $\alpha$ ,  $\beta$ , or  $\gamma$  phosphates of ATP or ADP, pyrophosphate (PPi), orthophosphate (Pi), and the phosphate group of L-Ser-P. Reaction mixtures containing  $\text{MgCl}_2$  (1 mM), ATP (3 mM), L-Ser (6 mM), and 10  $\mu\text{L}$  of detergent-free protein (11  $\mu\text{M}$ ), eluted directly from the Ni purification column, were incubated at 25°C for 1 h. A. L-Ser-P (3 mM) and ATP (3 mM) standards. B. Reaction mixture containing ATP and *RsBluE*. C. Reaction mixture containing ATP, L-Ser, and *RsBluE*.

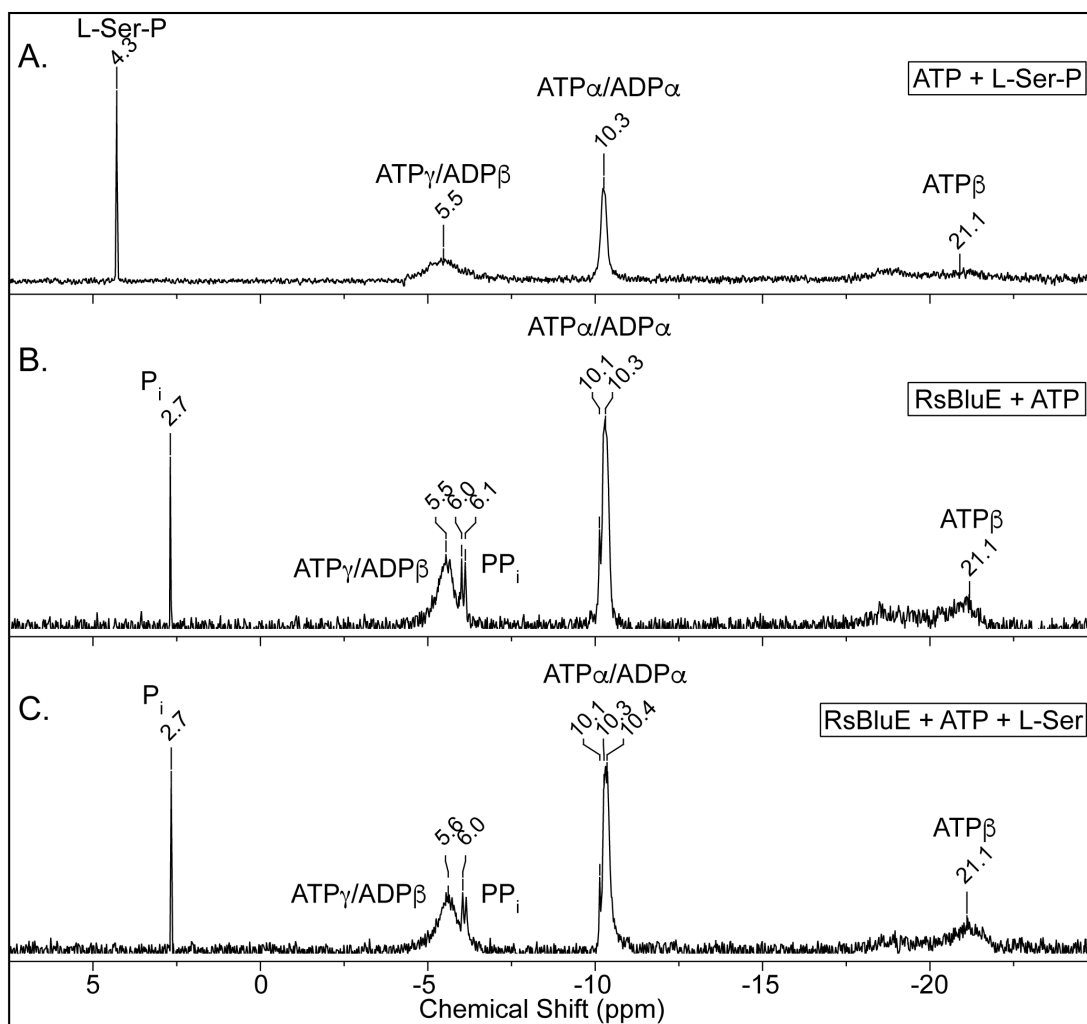

**Figure S7. ATPase activity as a function of substrate.** *R. sphaeroides* BluE (*RsBluE*) specific activity as a function of ATP, L-Thr, or L-Ser concentration (panels A, C, E, respectively). Panels B, D, and F show specific activities of *S. enterica* PduX (*SePduX*) as a function of ATP, L-Thr, or L-Ser concentration, respectively. Specific activity is reported in  $\mu\text{mol}$  of ATP per min per mg of protein with the mean standard error of triplicate reactions represented by the error bars. Activity was measured by the NADH-consuming assay described in *Material and Methods*. Assays were performed with purified, sarkosyl-solubilized *RsBluE* and *SePduX* ( $3 \mu\text{M}$ ) enzymes. For ATPase specific activity L-Thr concentration was held at 50 mM while the ATP concentration was varied (5 - 100 mM). To measure the effect of L-Thr and L-Ser on ATPase activity, the ATP concentration was held at 50 mM while the concentration L-Thr or L-Ser was varied (0 - 100 mM). Independent experiments were performed in duplicate. Error bars represent the standard deviation of triplicate reactions.

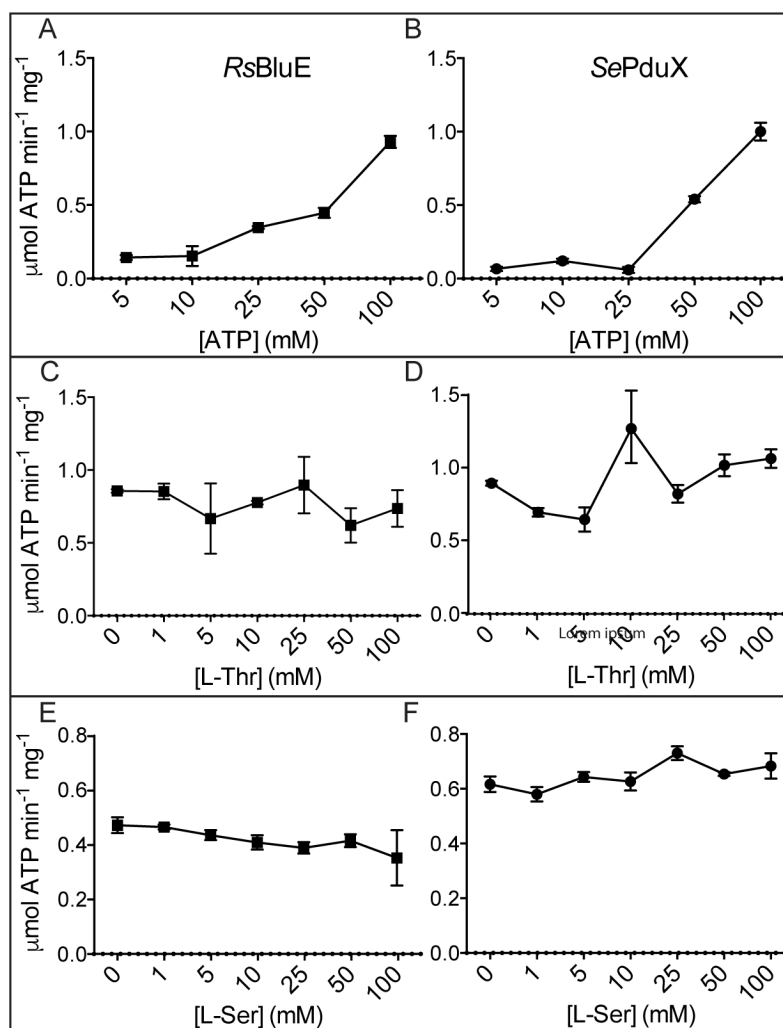

**Figure S8. Optimization of RsBluE reaction conditions.** ATPase activity assay measured with ADP-Glo™ Kinase/ATPase Assay kit, expressed as mM of ATP per mg of protein, with the standard error of the mean of triplicate reactions represented by the error bars. Unless otherwise indicated, each reaction mixture contained HEPES buffer (50 mM, pH 7.0 at 25°C), MgCl<sub>2</sub> (1 mM), ATP (0.1 mM), L-Thr (10 mM), and Sarkosyl-solubilized protein (12 μM) incubated at 25°C for 1 h. A. RsBluE activity as a function of pH. B. RsBluE activity as a function of protein concentration (2 - 24 μM). C. RsBluE activity in the presence of added salts (100 mM). D. RsBluE activity as a function of added divalent metals (1 mM). E. RsBluE activity as a function of L-Thr concentration (0.1 - 100 mM). F. RsBluE activity as a function of L-Ser concentration (0 - 100 mM). G. RsBluE activity as a function of added L- and D- amino acids (10 mM). H. RsBluE activity as a function of ATP concentration (1 - 20 mM) with L-Thr (50 mM). I. RsBluE activity in the presence of ATPase/kinase inhibitors ADP (20 mM), sodium pyrophosphate (PPi, 10 mM), sodium *ortho*-phosphate (Pi, 10 mM), adenosine 5'-[γ-thio]triphosphate (ADP-γ-S, 0.2 mM), α,β-methyleneadenosine 5'-triphosphate (AMP-CPP, 10 mM), and P1,P3-di(adenosine-5') triphosphate ammonium salt (Ap3A, 10 mM).

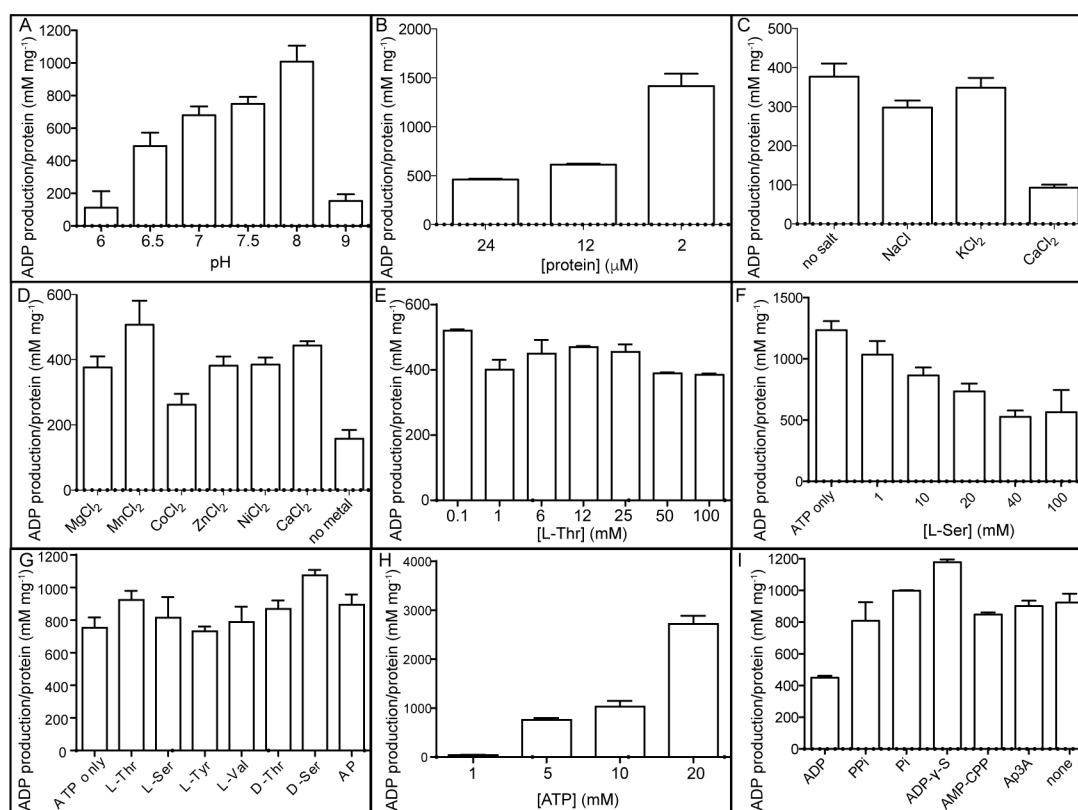

## REFERENCES

- Fan, C., and Bobik, T.A. (2008) The PDUX enzyme of *Salmonella enterica* is an L-threonine kinase used for coenzyme B<sub>12</sub> synthesis. *J. Biol. Chem.* **283**: 11322-11329.
- Fan, C., Fromm, H.J., and Bobik, T.A. (2009) Kinetic and functional analysis of L-threonine kinase, the PduX enzyme of *Salmonella enterica*. *J. Biol. Chem.* **284**: 20240-20248.
- Guzman, L.M., Belin, D., Carson, M.J., and Beckwith, J. (1995) Tight regulation, modulation, and high-level expression by vectors containing the arabinose PBAD promoter. *J. Bacteriol.* **177**: 4121-4130.
- Johnson, C.L., Pechonick, E., Park, S.D., Havemann, G.D., Leal, N.A., and Bobik, T.A. (2001) Functional genomic, biochemical, and genetic characterization of the *Salmonella pduO* gene, an ATP:cob(I)alamin adenosyltransferase gene. *J. Bacteriol.* **183**: 1577-1584.

- Kovach, M.E., Elzer, P.H., Hill, D.S., Robertson, G.T., Farris, M.A., Roop, R.M., 2nd, and Peterson, K.M. (1995) Four new derivatives of the broad-host-range cloning vector pBBR1MCS, carrying different antibiotic-resistance cassettes. *Gene* **166**: 175-176.
- Miroux, B., and Walker, J.E. (1996) Over-production of proteins in *Escherichia coli*: mutant hosts that allow synthesis of some membrane proteins and globular proteins at high levels. *J. Mol. Biol.* **260**: 289-298.
- Rocco, C.J., Dennison, K.L., Klenchin, V.A., Rayment, I., and Escalante-Semerena, J.C. (2008) Construction and use of new cloning vectors for the rapid isolation of recombinant proteins from *Escherichia coli*. *Plasmid* **59**: 231-237.
- Schafer, A., Tauch, A., Jager, W., Kalinowski, J., Thierbach, G., and Puhler, A. (1994) Small mobilizable multi-purpose cloning vectors derived from the *Escherichia coli* plasmids pK18 and pK19: selection of defined deletions in the chromosome of *Corynebacterium glutamicum*. *Gene* **145**: 69-73.
- Woodcock, D.M., Crowther, P.J., Doherty, J., Jefferson, S., De Cruz, E., Noyer-Weidner, M., Smith, S.S., Michael, M.Z., and Graham, M.W. (1989) Quantitative evaluation of *Escherichia coli* host strains for tolerance to cytosine methylation in plasmid and phage recombinants. *Nucl. Acids Res.* **17**: 3469-3478.
